# Supplementary material
Source: Springer Nature journal article supplement (https://www.springermedizin.de/resource/supplementary/12957_2011_895_MOESM5_ESM.pdf/9565746)

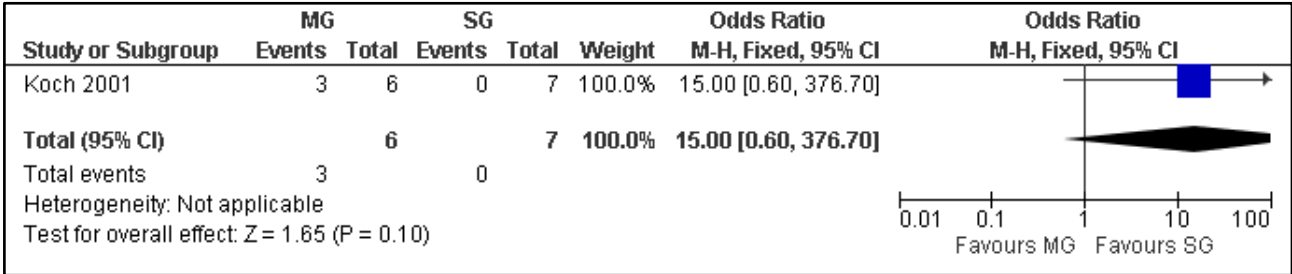

Supplement: MOESM5 [file 9565746]
